# Supplementary material for: High-resolution mapping of global winter-triticeae crops using a sample-free identification method
Source: Copernicus journal article supplement (doi:10.5194/essd-17-95-2025), 2025-01-16
Supplement: Supplementary file 1 [file essd-17-95-2025-supplement.pdf]

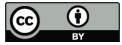

*Supplement of*

## **High-resolution mapping of global winter-triticeae crops using a sample-free identification method**

**Yangyang Fu et al.**

*Correspondence to:* Wenping Yuan ([yuanwp3@mail.sysu.edu.cn](mailto:yuanwp3@mail.sysu.edu.cn))

The copyright of individual parts of the supplement might differ from the article licence.

**Table S1:** The sources of agricultural statistical data in all countries.

| Country         | Source                                                                                                                                                          |
|-----------------|-----------------------------------------------------------------------------------------------------------------------------------------------------------------|
| Afghanistan     | <a href="https://invest.gov.af/">https://invest.gov.af/</a>                                                                                                     |
| Albania         | <a href="http://www.instat.gov.al/">http://www.instat.gov.al/</a>                                                                                               |
| Argentina       | <a href="https://datosestimaciones.magyp.gob.ar/reportes.php?reporte=Estimaciones">https://datosestimaciones.magyp.gob.ar/reportes.php?reporte=Estimaciones</a> |
| Australia       | <a href="https://www.agriculture.gov.au/abares">https://www.agriculture.gov.au/abares</a>                                                                       |
| Austria         | <a href="https://www.statistik.at/">https://www.statistik.at/</a>                                                                                               |
| Azerbaijan      | <a href="https://www.stat.gov.az/source/agriculture/?lang=en">https://www.stat.gov.az/source/agriculture/?lang=en</a>                                           |
| Brazil          | <a href="https://www.ibge.gov.br/en/statistics/full-list-statistics.html">https://www.ibge.gov.br/en/statistics/full-list-statistics.html</a>                   |
| Belgium         | <a href="https://statbel.fgov.be/de">https://statbel.fgov.be/de</a>                                                                                             |
| Bulgaria        | <a href="https://www.agrostat.bg/ISASPublic/Crops">https://www.agrostat.bg/ISASPublic/Crops</a>                                                                 |
| China           | <a href="https://www.stats.gov.cn/sj/">https://www.stats.gov.cn/sj/</a>                                                                                         |
| Croatia         | <a href="https://dzs.gov.hr/">https://dzs.gov.hr/</a>                                                                                                           |
| Czechia         | <a href="https://www.czso.cz/csu/czso">https://www.czso.cz/csu/czso</a>                                                                                         |
| Denmark         | <a href="https://www.dst.dk/en/Statistik">https://www.dst.dk/en/Statistik</a>                                                                                   |
| Estonia         | <a href="https://www.stat.ee/">https://www.stat.ee/</a>                                                                                                         |
| Finland         | <a href="http://www.stat.fi/index_en.html">www.stat.fi/index_en.html</a>                                                                                        |
| France          | <a href="https://agreste.agriculture.gouv.fr/agreste-web/accueil/">https://agreste.agriculture.gouv.fr/agreste-web/accueil/</a>                                 |
| Germany         | <a href="https://www.statistik-nord.de/">https://www.statistik-nord.de/</a>                                                                                     |
| Greece          | <a href="https://www.statistics.gr/en/home/">https://www.statistics.gr/en/home/</a>                                                                             |
| Hungary         | <a href="https://www.ksh.hu/?lang=en">https://www.ksh.hu/?lang=en</a>                                                                                           |
| India           | <a href="https://aps.dac.gov.in/APY/Public_Report1.aspx">https://aps.dac.gov.in/APY/Public_Report1.aspx</a>                                                     |
| Iran            | <a href="https://irandataportal.syr.edu/socio-economic-data/statistical-yearbook">https://irandataportal.syr.edu/socio-economic-data/statistical-yearbook</a>   |
| Iraq            | <a href="https://cosit.gov.iq/ar/">https://cosit.gov.iq/ar/</a>                                                                                                 |
| Ireland         | <a href="https://data.cso.ie/">https://data.cso.ie/</a>                                                                                                         |
| Italy           | <a href="https://www.istat.it/en/">https://www.istat.it/en/</a>                                                                                                 |
| Kyrgyzstan      | <a href="http://stat.kg/en/">http://stat.kg/en/</a>                                                                                                             |
| Latvia          | <a href="https://stat.gov.lv/en">https://stat.gov.lv/en</a>                                                                                                     |
| Lithuania       | <a href="https://osp.stat.gov.lt/">https://osp.stat.gov.lt/</a>                                                                                                 |
| Montenegro      | <a href="http://www.monstat.org/eng/index.php">www.monstat.org/eng/index.php</a>                                                                                |
| Morocco         | <a href="https://www.hcp.ma/">https://www.hcp.ma/</a>                                                                                                           |
| Nepal           | <a href="https://moald.gov.np/">https://moald.gov.np/</a>                                                                                                       |
| Netherlands     | <a href="https://www.cbs.nl/en-gb">https://www.cbs.nl/en-gb</a>                                                                                                 |
| North Macedonia | <a href="https://www.stat.gov.mk/Default_en.aspx">https://www.stat.gov.mk/Default_en.aspx</a>                                                                   |
| Norway          | <a href="http://www.ssb.no/english/">www.ssb.no/english/</a>                                                                                                    |
| Pakistan        | <a href="https://www.pbs.gov.pk/">https://www.pbs.gov.pk/</a>                                                                                                   |
| Poland          | Statistical Office in Białystok / Publications                                                                                                                  |
| Portugal        | <a href="http://www.ine.pt/xportal/xmain?xpid=INE&amp;xpgid=ine_main">www.ine.pt/xportal/xmain?xpid=INE&amp;xpgid=ine_main</a>                                  |
| Romania         | <a href="http://statistici.insse.ro:8077/tempo-online">http://statistici.insse.ro:8077/tempo-online</a>                                                         |
| Russia          | <a href="https://rosstat.gov.ru/">https://rosstat.gov.ru/</a>                                                                                                   |
| Serbia          | <a href="https://www.stat.gov.rs">https://www.stat.gov.rs</a>                                                                                                   |
| Slovakia        | <a href="https://slovak.statistics.sk/wps/portal/ext/home">https://slovak.statistics.sk/wps/portal/ext/home</a>                                                 |

|                 |                                                                                                   |
|-----------------|---------------------------------------------------------------------------------------------------|
| Slovenia        | <a href="https://www.stat.si/statweb/en/home">https://www.stat.si/statweb/en/home</a>             |
| Spain           | <a href="https://www.ine.es/en/index.htm">https://www.ine.es/en/index.htm</a>                     |
| Sweden          | <a href="http://www.scb.se/en/">www.scb.se/en/</a>                                                |
| Switzerland     | <a href="https://www.bfs.admin.ch/bfs/de/home.html">https://www.bfs.admin.ch/bfs/de/home.html</a> |
| Turkey          | <a href="https://www.tuik.gov.tr/">https://www.tuik.gov.tr/</a>                                   |
| Ukraine         | <a href="https://statzvit.ukrstat.gov.ua/">https://statzvit.ukrstat.gov.ua/</a>                   |
| United Kingdom  | <a href="https://www.gov.uk/">https://www.gov.uk/</a>                                             |
| United States   | <a href="https://www.nass.usda.gov/">https://www.nass.usda.gov/</a>                               |
| Other countries | <a href="https://www.fao.org/home/en/">https://www.fao.org/home/en/</a>                           |

**Table S2:** The abbreviations of countries in the study area.

| Number | Abbreviation | Country                |
|--------|--------------|------------------------|
| 1      | AFG          | Afghanistan            |
| 2      | ALB          | Albania                |
| 3      | ARG          | Argentina              |
| 4      | AUS          | Australia              |
| 5      | AUT          | Austria                |
| 6      | AZE          | Azerbaijan             |
| 7      | BEL          | Belgium                |
| 8      | BGD          | Bangladesh             |
| 9      | BGR          | Bulgaria               |
| 10     | BIH          | Bosnia and Herzegovina |
| 11     | BLR          | Belarus                |
| 12     | BRA          | Brazil                 |
| 13     | CHE          | Switzerland            |
| 14     | CHN          | China                  |
| 15     | CZE          | Czechia                |
| 16     | DEU          | Germany                |
| 17     | DNK          | Denmark                |
| 18     | DZA          | Algeria                |
| 19     | EGY          | Egypt                  |
| 20     | ESP          | Spain                  |
| 21     | EST          | Estonia                |
| 22     | ETH          | Ethiopia               |
| 23     | FIN          | Finland                |
| 24     | FRA          | France                 |
| 25     | GRC          | Greece                 |
| 26     | HRV          | Croatia                |
| 27     | HUN          | Hungary                |
| 28     | IND          | India                  |
| 29     | IRL          | Ireland                |

---

|    |     |                      |
|----|-----|----------------------|
| 30 | IRN | Iran                 |
| 31 | IRQ | Iraq                 |
| 32 | ITA | Italy                |
| 33 | KGZ | Kyrgyzstan           |
| 34 | LBY | Libya                |
| 35 | LTU | Lithuania            |
| 36 | LVA | Latvia               |
| 37 | MAR | Morocco              |
| 38 | MDA | Moldova              |
| 39 | MEX | Mexico               |
| 40 | MKD | North Macedonia      |
| 41 | MNE | Montenegro           |
| 42 | NLD | Netherlands          |
| 43 | NOR | Norway               |
| 44 | NPL | Nepal                |
| 45 | PAK | Pakistan             |
| 46 | POL | Poland               |
| 47 | PRT | Portugal             |
| 48 | PRY | Paraguay             |
| 49 | ROU | Romania              |
| 50 | RUS | Russia               |
| 51 | SDN | Sudan                |
| 52 | SRB | Serbia               |
| 53 | SVK | Slovakia             |
| 54 | SVN | Slovenia             |
| 55 | SWE | Sweden               |
| 56 | SYR | Syrian Arab Republic |
| 57 | TJK | Tajikistan           |
| 58 | TKM | Turkmenistan         |
| 59 | TUN | Tunisia              |
| 60 | TUR | Turkey               |
| 61 | UK  | United Kingdom       |
| 62 | UKR | Ukraine              |
| 63 | URY | Uruguay              |
| 64 | US  | United States        |
| 65 | UZB | Uzbekistan           |
| 66 | ZAF | South Africa         |

---

**Table S3:** The abbreviations of states (provinces) in the study area.

| Country           | Number | Abbreviation | State (Province)  |
|-------------------|--------|--------------|-------------------|
| Australia         | 1      | NSW          | New South Wales   |
|                   | 2      | QS           | Queensland        |
|                   | 3      | SA           | South Australia   |
|                   | 4      | TS           | Tasmania          |
|                   | 5      | VT           | Victoria          |
|                   | 6      | WA           | Western Australia |
| Brazil            | 7      | MG           | Minas Gerais      |
|                   | 8      | PR           | Parana            |
|                   | 9      | RS           | Rio Grande do Sul |
|                   | 10     | SC           | Santa Catarina    |
|                   | 11     | SP           | Sao Paulo         |
| China             | 12     | AH           | Anhui             |
|                   | 13     | GS           | Gansu             |
|                   | 14     | HB           | Hebei             |
|                   | 15     | HN           | Henan             |
|                   | 16     | HuB          | Hubei             |
|                   | 17     | JS           | Jiangsu           |
|                   | 18     | SAX          | Shanxi            |
|                   | 19     | SC           | Sichuan           |
|                   | 20     | SD           | Shandong          |
|                   | 21     | SX           | Shanxi            |
|                   | 22     | XJ           | Xinjiang          |
| India             | 23     | BR           | Bihar             |
|                   | 24     | CT           | Chhattisgarh      |
|                   | 25     | GJ           | Gujarat           |
|                   | 26     | HP           | Himachal Pradesh  |
|                   | 27     | HR           | Haryana           |
|                   | 28     | JH           | Jharkhand         |
|                   | 29     | JK           | Jammu and Kashmir |
|                   | 30     | KA           | Karnataka         |
|                   | 31     | MH           | Maharashtra       |
|                   | 32     | MP           | Madhya Pradesh    |
|                   | 33     | PB           | Punjab            |
|                   | 34     | RJ           | Rajasthan         |
|                   | 35     | UP           | Uttar Pradesh     |
|                   | 36     | UT           | Uttarakhand       |
|                   | 37     | WB           | West Bengal       |
| The United States | 38     | AL           | Alabama           |
|                   | 39     | AR           | Arkansas          |
|                   | 40     | CA           | California        |
|                   | 41     | CO           | Colorado          |

|    |    |                |
|----|----|----------------|
| 42 | DE | Delaware       |
| 43 | GA | Georgia        |
| 44 | ID | Idaho          |
| 45 | IL | Illinois       |
| 46 | IN | Indiana        |
| 47 | KS | Kansas         |
| 48 | KY | Kentucky       |
| 49 | MD | Maryland       |
| 50 | MI | Michigan       |
| 51 | MO | Missouri       |
| 52 | MS | Mississippi    |
| 53 | MT | Montana        |
| 54 | NC | North Carolina |
| 55 | ND | North Dakota   |
| 56 | NE | Nebraska       |
| 57 | NJ | New Jersey     |
| 58 | NM | New Mexico     |
| 59 | NY | New York       |
| 60 | OH | Ohio           |
| 61 | OK | Oklahoma       |
| 62 | OR | Oregon         |
| 63 | PA | Pennsylvania   |
| 64 | SC | South Carolina |
| 65 | SD | South Dakota   |
| 66 | TN | Tennessee      |
| 67 | TX | Texas          |
| 68 | UT | Utah           |
| 69 | VA | Virginia       |
| 70 | WA | Washington     |
| 71 | WI | Wisconsin      |
| 72 | WY | Wyoming        |

**Table S4:** The confusion matrix of the identification maps of winter-triticeae crops based on CDL dataset.

| Country      | CDL samples                | Map                    |                            | Producer's accuracy (%) | User's accuracy (%) | Overall accuracy (%) | F1 score (%) |
|--------------|----------------------------|------------------------|----------------------------|-------------------------|---------------------|----------------------|--------------|
|              |                            | Winter-triticeae crops | Non-Winter-triticeae crops |                         |                     |                      |              |
| Alabama (AL) | Winter-triticeae crops     | 99                     | 38                         | 72.26                   | 88.39               | 88.54                | 79.52        |
|              | Non-Winter-triticeae crops | 13                     | 295                        | 95.78                   | 88.59               |                      |              |

|                    |                                |     |     |       |       |       |       |
|--------------------|--------------------------------|-----|-----|-------|-------|-------|-------|
| Arkansas<br>(AR)   | Winter-triticeae<br>crops      | 101 | 18  | 84.87 | 90.18 | 90.76 | 87.45 |
|                    | Non-Winter-<br>triticeae crops | 11  | 184 | 94.36 | 91.09 |       |       |
| California<br>(CA) | Winter-triticeae<br>crops      | 34  | 20  | 62.96 | 79.07 | 75.21 | 70.10 |
|                    | Non-Winter-<br>triticeae crops | 9   | 54  | 85.71 | 72.97 |       |       |
| Colorado<br>(CO)   | Winter-triticeae<br>crops      | 204 | 31  | 86.81 | 90.67 | 93.59 | 88.70 |
|                    | Non-Winter-<br>triticeae crops | 21  | 555 | 96.35 | 94.71 |       |       |
| Delaware<br>(DE)   | Winter-triticeae<br>crops      | 308 | 62  | 83.24 | 90.59 | 90.12 | 86.76 |
|                    | Non-Winter-<br>triticeae crops | 32  | 549 | 94.49 | 89.85 |       |       |
| Georgia<br>(GA)    | Winter-triticeae<br>crops      | 64  | 31  | 67.37 | 84.21 | 81.47 | 74.85 |
|                    | Non-Winter-<br>triticeae crops | 12  | 125 | 91.24 | 80.13 |       |       |
| Idaho<br>(ID)      | Winter-triticeae<br>crops      | 174 | 66  | 72.50 | 80.18 | 82.36 | 76.15 |
|                    | Non-Winter-<br>triticeae crops | 43  | 335 | 88.62 | 83.54 |       |       |
| Illinois<br>(IL)   | Winter-triticeae<br>crops      | 247 | 49  | 83.45 | 92.51 | 91.68 | 87.74 |
|                    | Non-Winter-<br>triticeae crops | 20  | 513 | 96.25 | 91.28 |       |       |
| Indiana<br>(IN)    | Winter-triticeae<br>crops      | 287 | 95  | 75.13 | 96.31 | 89.21 | 84.41 |
|                    | Non-Winter-<br>triticeae crops | 11  | 589 | 98.17 | 86.11 |       |       |
| Kansas<br>(KS)     | Winter-triticeae<br>crops      | 344 | 46  | 88.21 | 93.99 | 93.13 | 91.01 |
|                    | Non-Winter-<br>triticeae crops | 22  | 578 | 96.33 | 92.63 |       |       |

|                           |                                  | triticaceae crops |     |       |       |       |       |
|---------------------------|----------------------------------|-------------------|-----|-------|-------|-------|-------|
| Kentucky<br>(KY)          | Winter-triticaceae<br>crops      | 130               | 25  | 83.87 | 90.28 | 90.30 | 86.96 |
|                           | Non-Winter-<br>triticaceae crops | 14                | 233 | 94.33 | 90.31 |       |       |
| Maryland<br>(MD)          | Winter-triticaceae<br>crops      | 216               | 78  | 73.47 | 85.04 | 87.14 | 78.83 |
|                           | Non-Winter-<br>triticaceae crops | 38                | 570 | 93.75 | 87.96 |       |       |
| Michigan<br>(MI)          | Winter-triticaceae<br>crops      | 345               | 80  | 81.18 | 97.46 | 91.32 | 88.58 |
|                           | Non-Winter-<br>triticaceae crops | 9                 | 591 | 98.50 | 88.08 |       |       |
| Missouri<br>(MO)          | Winter-triticaceae<br>crops      | 148               | 50  | 74.75 | 85.06 | 88.74 | 79.57 |
|                           | Non-Winter-<br>triticaceae crops | 26                | 451 | 94.55 | 90.02 |       |       |
| Mississippi<br>(MS)       | Winter-triticaceae<br>crops      | 73                | 30  | 70.87 | 83.91 | 82.26 | 76.84 |
|                           | Non-Winter-<br>triticaceae crops | 14                | 131 | 90.34 | 81.37 |       |       |
| Montana<br>(MT)           | Winter-triticaceae<br>crops      | 122               | 51  | 70.52 | 81.88 | 84.46 | 75.78 |
|                           | Non-Winter-<br>triticaceae crops | 27                | 302 | 91.79 | 85.55 |       |       |
| North<br>Carolina<br>(NC) | Winter-triticaceae<br>crops      | 108               | 30  | 78.26 | 89.26 | 86.73 | 83.40 |
|                           | Non-Winter-<br>triticaceae crops | 13                | 173 | 93.01 | 85.22 |       |       |
| North Dakota<br>(ND)      | Winter-triticaceae<br>crops      | 63                | 45  | 58.33 | 77.78 | 70.42 | 66.67 |
|                           | Non-Winter-<br>triticaceae crops | 18                | 87  | 82.86 | 65.91 |       |       |
| Nebraska<br>(NE)          | Winter-triticaceae<br>crops      | 263               | 51  | 83.76 | 88.55 | 89.68 | 86.09 |



|                        |                            |     |     |       |       |       |       |
|------------------------|----------------------------|-----|-----|-------|-------|-------|-------|
|                        | Non-Winter-triticeae crops | 34  | 476 | 93.33 | 90.32 |       |       |
| New Jersey<br>(NJ)     | Winter-triticeae crops     | 203 | 70  | 74.36 | 91.44 | 85.02 | 82.02 |
|                        | Non-Winter-triticeae crops | 19  | 302 | 94.08 | 81.18 |       |       |
| New Mexico<br>(NM)     | Winter-triticeae crops     | 79  | 32  | 71.17 | 84.95 | 79.46 | 77.45 |
|                        | Non-Winter-triticeae crops | 14  | 99  | 87.61 | 75.57 |       |       |
| New York<br>(NY)       | Winter-triticeae crops     | 167 | 70  | 70.46 | 84.77 | 77.43 | 76.96 |
|                        | Non-Winter-triticeae crops | 30  | 176 | 85.44 | 71.54 |       |       |
| Ohio<br>(OH)           | Winter-triticeae crops     | 315 | 49  | 86.54 | 94.59 | 92.49 | 90.39 |
|                        | Non-Winter-triticeae crops | 18  | 510 | 96.59 | 91.23 |       |       |
| Oklahoma<br>(OK)       | Winter-triticeae crops     | 159 | 27  | 85.48 | 90.34 | 94.24 | 87.85 |
|                        | Non-Winter-triticeae crops | 17  | 561 | 97.06 | 95.41 |       |       |
| Oregon<br>(OR)         | Winter-triticeae crops     | 244 | 36  | 87.14 | 91.73 | 92.67 | 89.38 |
|                        | Non-Winter-triticeae crops | 22  | 489 | 95.69 | 93.14 |       |       |
| Pennsylvania<br>(PA)   | Winter-triticeae crops     | 162 | 34  | 82.65 | 90.00 | 91.23 | 86.17 |
|                        | Non-Winter-triticeae crops | 18  | 379 | 95.47 | 91.77 |       |       |
| South Carolina<br>(SC) | Winter-triticeae crops     | 91  | 28  | 76.47 | 89.22 | 86.17 | 82.35 |
|                        | Non-Winter-triticeae crops | 11  | 152 | 93.25 | 84.44 |       |       |
| South Dakota           | Winter-triticeae           | 147 | 61  | 70.67 | 84.00 | 83.79 | 76.76 |

|            |                            |     |     |       |       |       |       |
|------------|----------------------------|-----|-----|-------|-------|-------|-------|
| (SD)       | crops                      |     |     |       |       |       |       |
|            | Non-Winter-triticeae crops | 28  | 313 | 91.79 | 83.69 |       |       |
| Tennessee  | Winter-triticeae crops     | 99  | 33  | 75.00 | 90.83 |       |       |
| (TN)       | Non-Winter-triticeae crops | 10  | 234 | 95.90 | 87.64 | 88.56 | 82.16 |
| Texas      | Winter-triticeae crops     | 113 | 24  | 82.48 | 89.68 |       |       |
| (TX)       | Non-Winter-triticeae crops | 13  | 353 | 96.45 | 93.63 | 92.64 | 85.93 |
| Utah       | Winter-triticeae crops     | 76  | 29  | 72.38 | 83.52 |       |       |
| (UT)       | Non-Winter-triticeae crops | 15  | 113 | 88.28 | 79.58 | 81.12 | 77.55 |
| Virginia   | Winter-triticeae crops     | 124 | 27  | 82.12 | 90.51 |       |       |
| (VA)       | Non-Winter-triticeae crops | 13  | 273 | 95.45 | 91.00 | 90.85 | 86.11 |
| Washington | Winter-triticeae crops     | 275 | 80  | 77.46 | 84.88 |       |       |
| (WA)       | Non-Winter-triticeae crops | 49  | 536 | 91.62 | 87.01 | 86.28 | 81.00 |
| Wisconsin  | Winter-triticeae crops     | 214 | 64  | 76.98 | 89.54 |       |       |
| (WI)       | Non-Winter-triticeae crops | 25  | 320 | 92.75 | 83.33 | 85.71 | 82.79 |
| Wyoming    | Winter-triticeae crops     | 100 | 42  | 70.42 | 89.29 |       |       |
| (WY)       | Non-Winter-triticeae crops | 12  | 198 | 94.29 | 82.50 | 84.66 | 78.74 |

**Table S5:** The confusion matrix of the identification maps of winter-triticeae crops based on EuroCrops dataset.

| Country           | EuroCrops samples          | Map                    |                            | Producer's accuracy (%) | User's accuracy (%) | Overall accuracy (%) | F1 score (%) |
|-------------------|----------------------------|------------------------|----------------------------|-------------------------|---------------------|----------------------|--------------|
|                   |                            | Winter-triticeae crops | Non-Winter-triticeae crops |                         |                     |                      |              |
| Austria (AUT)     | Winter-triticeae crops     | 240                    | 96                         | 71.43                   | 89.22               | 85.05                | 79.34        |
|                   | Non-Winter-triticeae crops | 29                     | 471                        | 94.20                   | 83.07               |                      |              |
| Belgium (BEL)     | Winter-triticeae crops     | 139                    | 50                         | 73.54                   | 76.37               | 86.50                | 74.93        |
|                   | Non-Winter-triticeae crops | 43                     | 457                        | 91.40                   | 90.14               |                      |              |
| Denmark (DNK)     | Winter-triticeae crops     | 185                    | 60                         | 75.51                   | 84.09               | 83.76                | 79.57        |
|                   | Non-Winter-triticeae crops | 35                     | 305                        | 89.71                   | 83.56               |                      |              |
| Estonia (EST)     | Winter-triticeae crops     | 128                    | 73                         | 63.68                   | 92.75               | 82.96                | 75.52        |
|                   | Non-Winter-triticeae crops | 10                     | 276                        | 96.50                   | 79.08               |                      |              |
| France (FRA)      | Winter-triticeae crops     | 285                    | 57                         | 83.33                   | 89.34               | 87.53                | 86.23        |
|                   | Non-Winter-triticeae crops | 34                     | 354                        | 91.24                   | 86.13               |                      |              |
| German (DEU)      | Winter-triticeae crops     | 128                    | 23                         | 84.77                   | 96.24               | 94.79                | 90.14        |
|                   | Non-Winter-triticeae crops | 5                      | 381                        | 98.70                   | 94.31               |                      |              |
| Netherlands (NLD) | Winter-triticeae crops     | 62                     | 27                         | 69.66                   | 93.94               | 87.98                | 80.00        |
|                   | Non-Winter-triticeae crops | 4                      | 165                        | 97.63                   | 85.94               |                      |              |
| Slovakia (SVK)    | Winter-triticeae crops     | 161                    | 78                         | 67.36                   | 80.90               | 71.22                | 73.52        |

|                |                            |     |     |       |       |       |       |
|----------------|----------------------------|-----|-----|-------|-------|-------|-------|
|                | Non-Winter-triticeae crops | 38  | 126 | 76.83 | 61.76 |       |       |
| Slovenia (SVN) | Winter-triticeae crops     | 108 | 30  | 78.26 | 85.71 | 84.26 | 81.82 |
|                | Non-Winter-triticeae crops | 18  | 149 | 89.22 | 83.24 |       |       |
|                | Winter-triticeae crops     | 45  | 25  | 64.29 | 71.43 | 74.71 | 67.67 |
| Sweden (SWE)   | Non-Winter-triticeae crops | 18  | 82  | 82.00 | 76.64 |       |       |

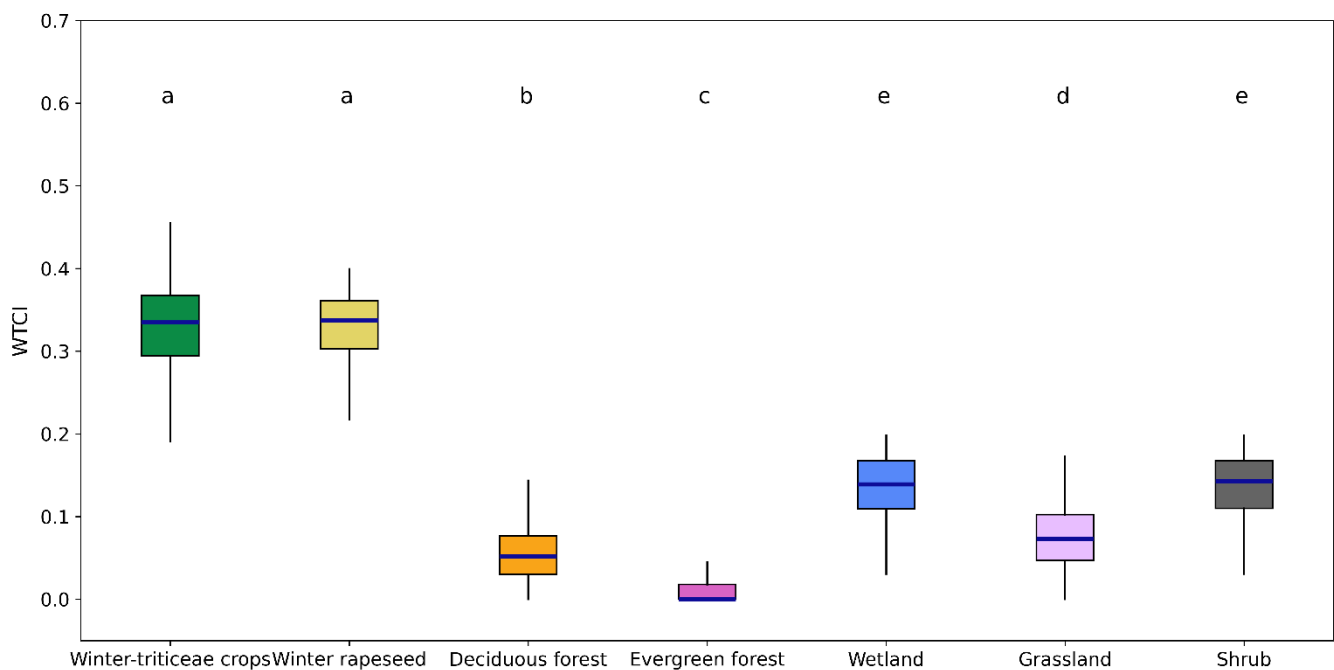

**Figure S1:** WTCI values of different land cover types. Letters represent statistically significant differences in WTCI values for different land cover types (Tukey's Test,  $P < 0.05$ ).

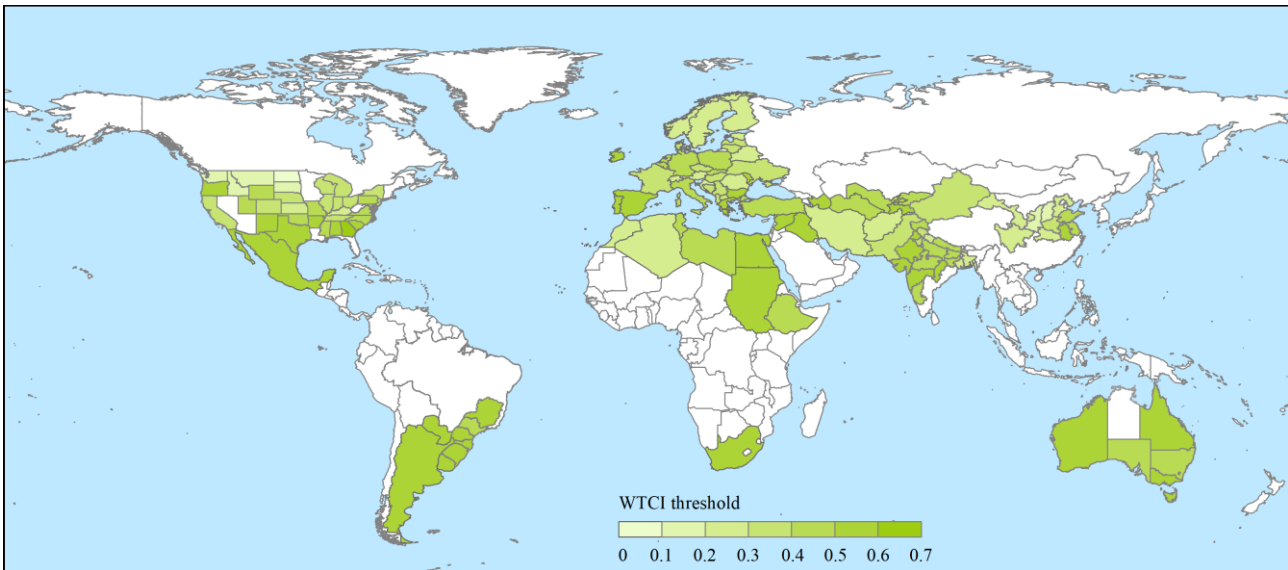

**Figure S2:** The spatial distribution of WTCI thresholds in all identification units in 2020.

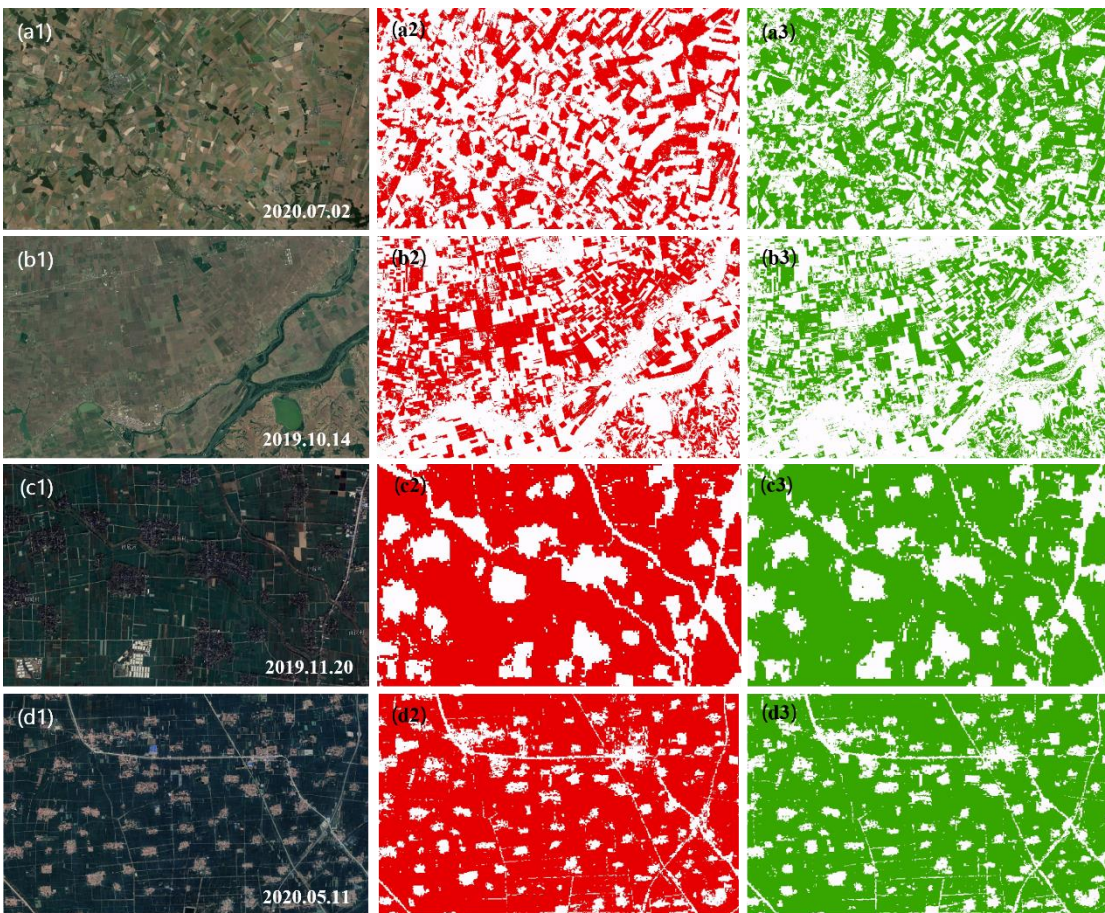

**Figure S3:** Comparison between the identification maps of this study and other studies. (a1-d1) represent the high-resolution images from © Google Earth in the study area; (a2-d2) represent the zoomed-in maps of the identification results based on WTCI method; (a3-d3) represent the zoomed-in maps of the identification results of other studies. Area a-d can be found in Figure 5.

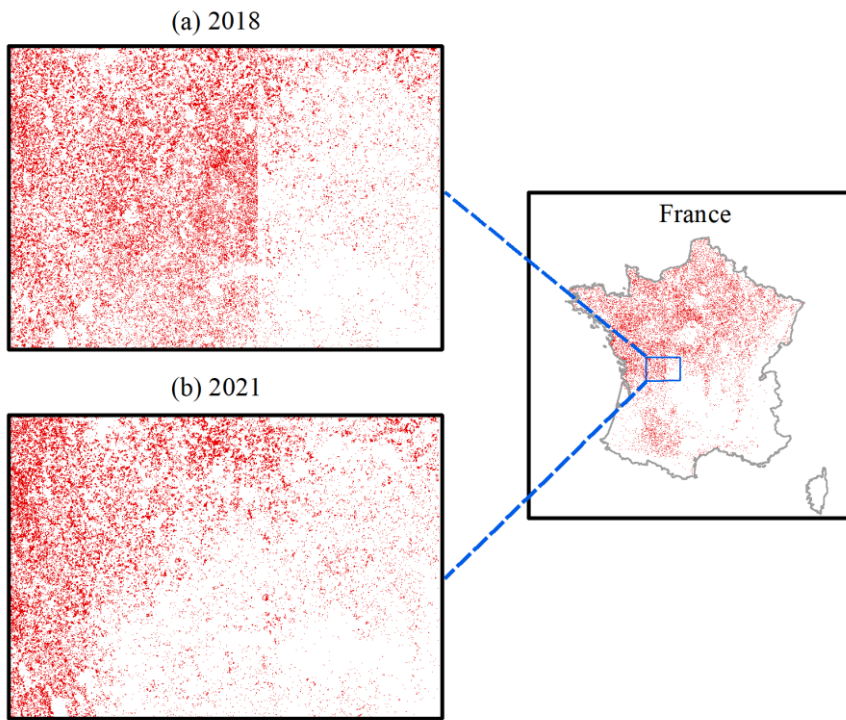

**Figure S4:** Comparison of distribution maps of winter-triticeae crops between different years. (a) and (b) show the zoomed-in maps of subregion in France in 2018 and 2021, respectively.
